# Supplementary material for: Two-Step Hydrothermal Pretreatments for Co-Producing Xylooligosaccharides and Humic-like Acid from Vinegar Residue
Source: MDPI journal article supplement (doi:10.3390/fermentation9070589), 2023-06-24
Supplement: s1 [file s1]

## Supporting Material

# Two-Step Hydrothermal Pretreatments for Co-Producing Xylooligosaccharides and Humic-like Acid from Vinegar Residue

Ningxin Jiao <sup>1</sup>, Yuanyuan Zhu <sup>2,\*</sup>, Haoran Li <sup>1</sup>, Yongjian Yu <sup>2</sup>, Yong Xu <sup>1</sup> and Junjun Zhu <sup>1,\*</sup>

<sup>1</sup> Jiangsu Co-Innovation Center of Efficient Processing and Utilization of Forest Resources, College of Chemical Engineering, Nanjing Forestry University, Nanjing 210037, China; jh33067@163.com (N.J.); 13770329710@163.com (H.L.); xuyong@njfu.edu.cn (Y.X.)

<sup>2</sup> School of Grain Science and Technology, Jiangsu University of Science and Technology, Zhenjiang 212004, China; yuyj@just.edu.cn

\* Correspondence: zhuyy@just.edu.cn (Y.Z.); zhujj@njfu.edu.cn (J.Z.); Tel.: +86-511-84423038 (Y.Z.); +86-25-85427587 (J.Z.)

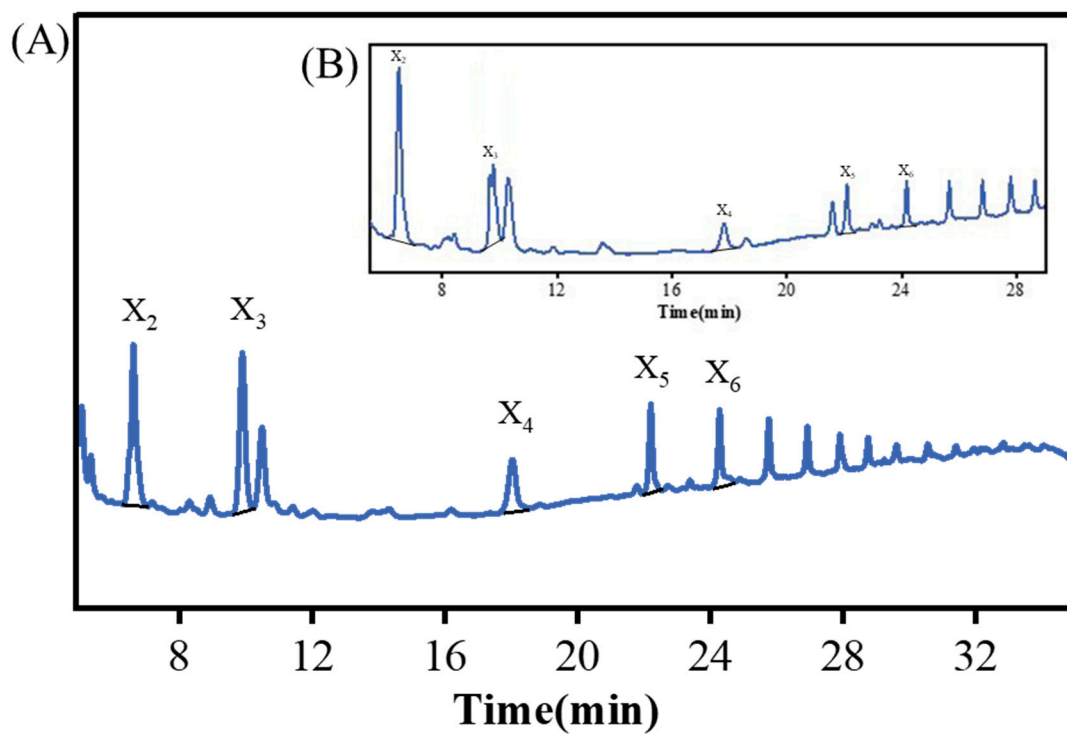

Figure S1. HPAEC chromatogram of (A) the XOS autohydrolysate from vinegar residue at 170 °C for 50 min and (B) the XOS obtained by endoxylanase hydrolysis autohydrolysate of vinegar residue at 170 °C.

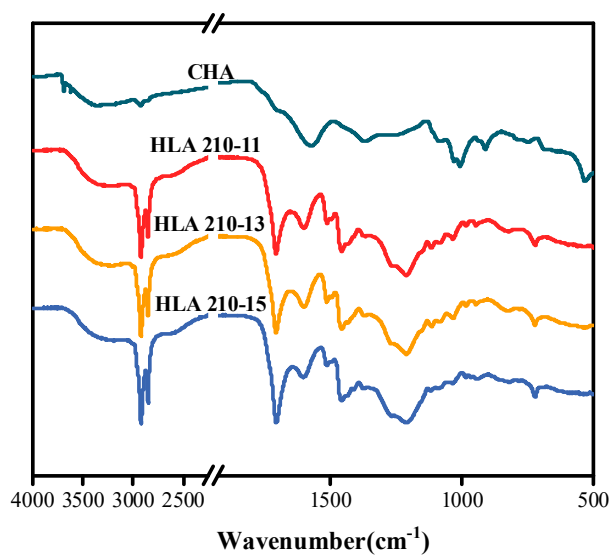

**Figure S2.** FT-IR spectra of CHA and HLA 210-11/13/15.

Abbreviations: CHA, commercial humic acid; HLA 210-11/13/15, humic-like acid (HLA) produced from the supernatant of the second-step hydrothermal pretreatment (0.6 mol/L KOH at 210 °C for 11, 13 and 15 h, respectively) after acidification (using 1 mol/L HCl to pH2) and precipitation.

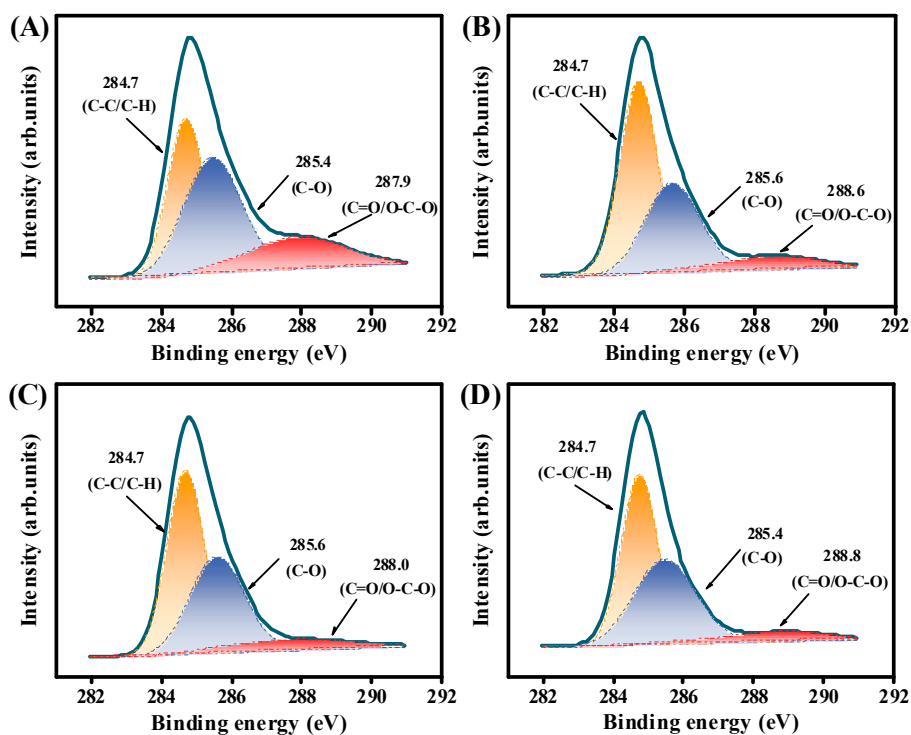

**Figure S3.** High-resolution C 1s XPS spectra of CHA (A) and HLA 210-11/13/15 (B-D).

Abbreviations: CHA, commercial humic acid; HLA 210-11/13/15, humic-like acid (HLA) produced from the supernatant of the second-step hydrothermal pretreatment (0.6 mol/L KOH at 210 °C for 11, 13 and 15 h, respectively) after acidification (using 1 mol/L HCl to pH2) and precipitation.

**Table S1.** Organic acids composition analysis in the unwashed vinegar residue.

| Component      | Contents (mg/g) |
|----------------|-----------------|
| Formic acid    | 1.21±0.1        |
| Acetic acid    | 20.05±0.2       |
| Butyric acid   | 2.48±0.0        |
| Lactic acid    | 4.62±0.0        |
| Propionic acid | 7.80±0.1        |
